# Supplementary material for: Macrophage GSK3β-deficiency inhibits the progression of hepatocellular carcinoma and enhances the sensitivity of anti-PD1 immunotherapy
Source: PubMed Central journal article supplement — J Immunother Cancer. 2022 Dec 20;10(12):e005655. doi: 10.1136/jitc-2022-005655 (PMC9772694; doi:10.1136/jitc-2022-005655), 2022-12-20
Supplement: jitc-2022-005655supp008.pdf [file jitc-2022-005655supp008.pdf]

1 **Supplementary figure legends:**

- 2 Figure S1: (A-B)The result of qRT-PCR that used to detect the expression of cytokines secreted by TAMs after treatment with GSK3 $\beta$  inhibitor or NF- $\kappa$ B inhibitor. (C-D) The expression of related proteins in TAMs added GSK3 $\beta$  inhibitor or PBS. \* $p < 0.05$ , \*\* $p < 0.01$ , \*\*\* $p < 0.001$ . ns indicated no significant different.

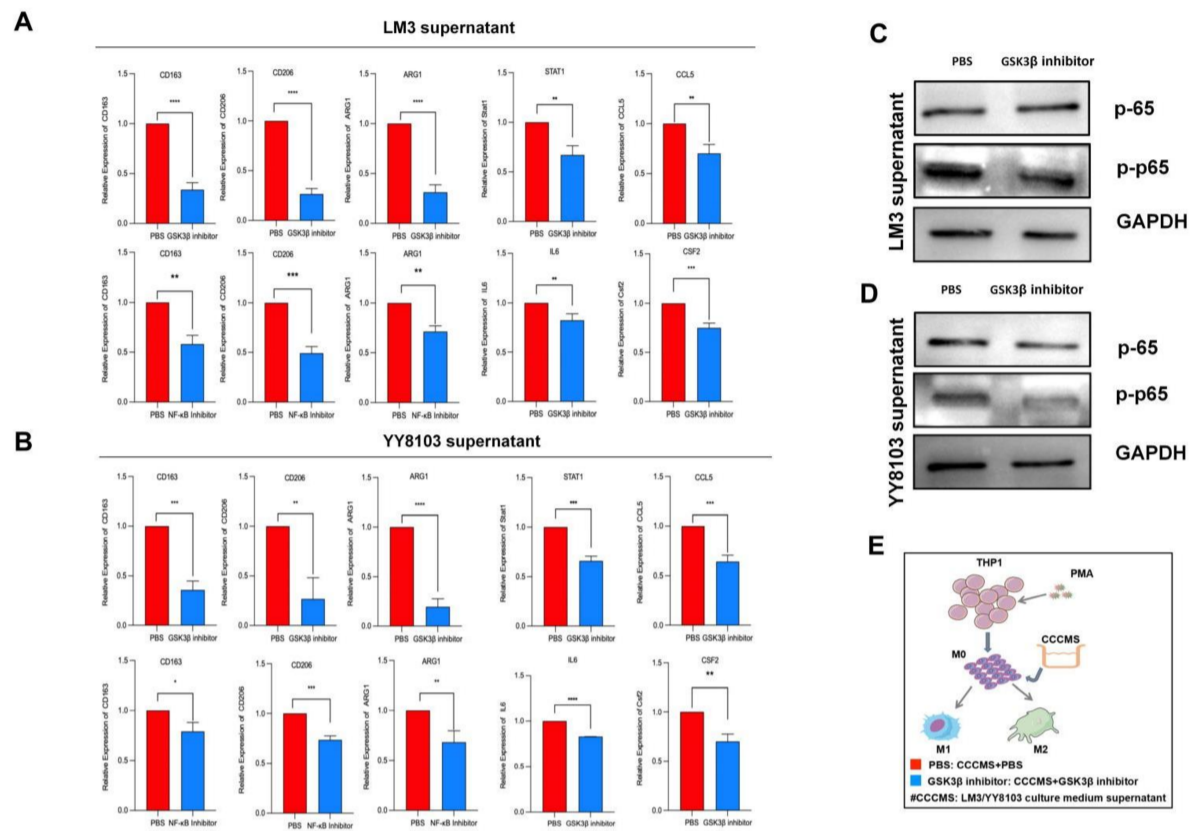

5

6

- 7 Figure S2: (A) Results of expression level of PD-L1 in GSK3 $\beta$  inhibitor and PBS group of TAMs. (B) Co-immunoprecipitation assays showed an interaction between GSK3 $\beta$  and PD-L1 in 293T cell. Input was as a control.

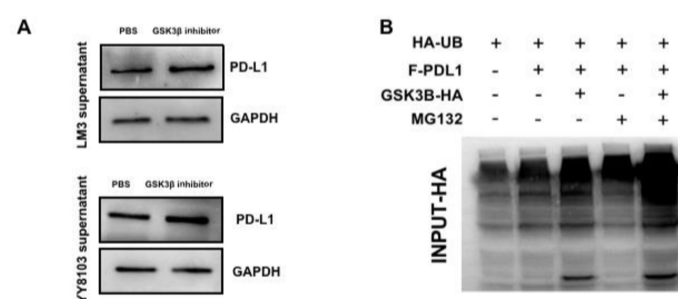

9

- 10 Figure S3: Correlations between GSK3 $\beta$  expression and act-CD8, PDCD1, TIGIT, CTLA4.

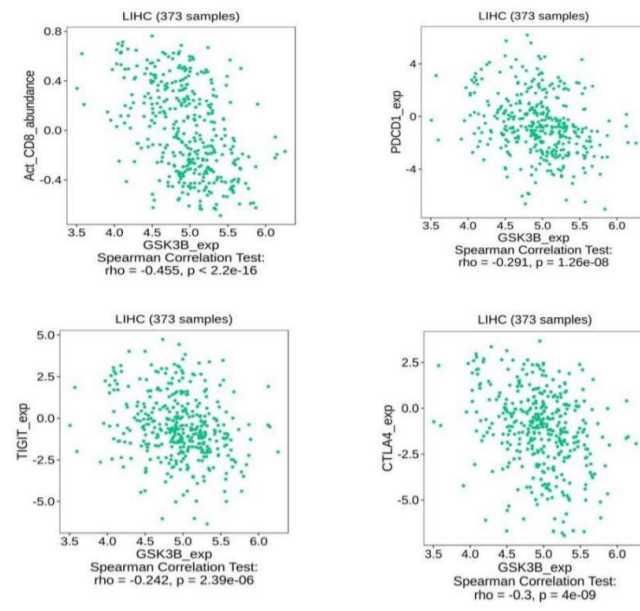

11  
12  
13

14 Figure S4: The expression of cell clustering marker genes via mass cytometry of mice tumor sample.

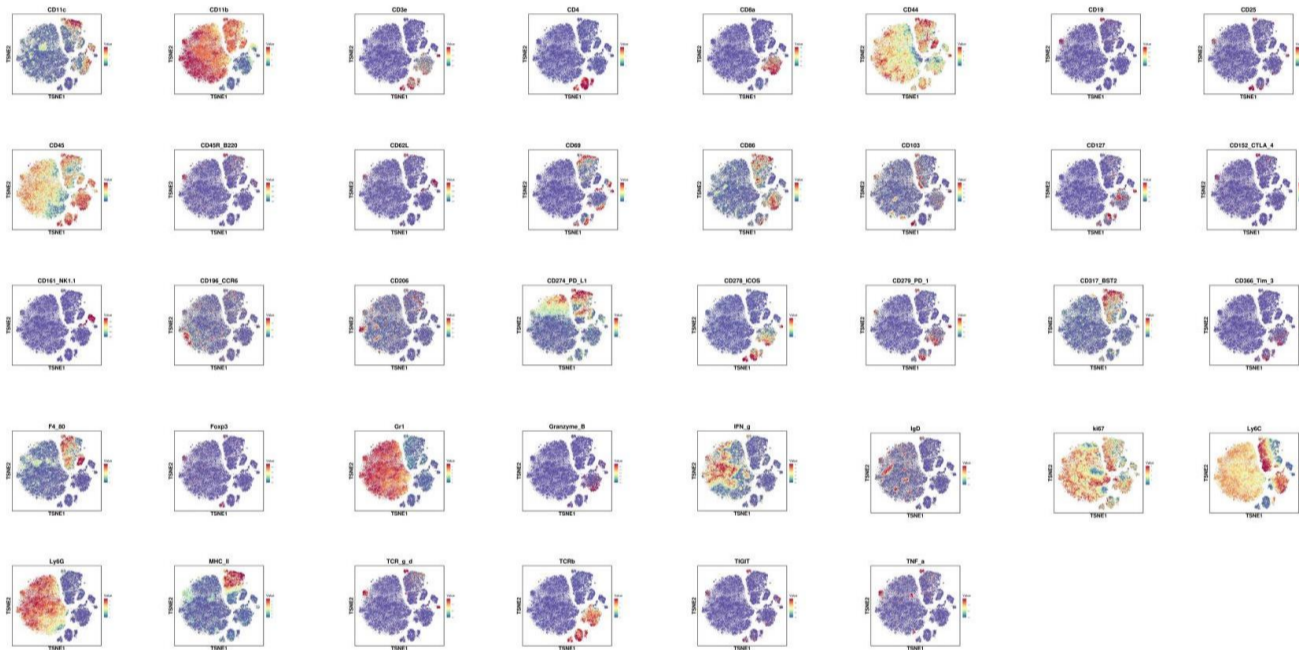

15  
16

17 Figure S5: Mass spectrometry process.

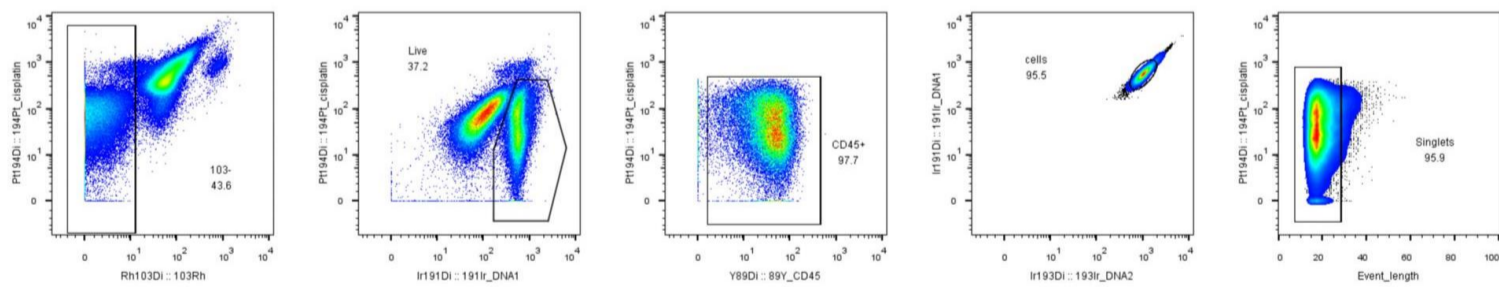

18  
19

20 Figure S6 The expression of cell clustering marker genes via mass cytometry of human samples.

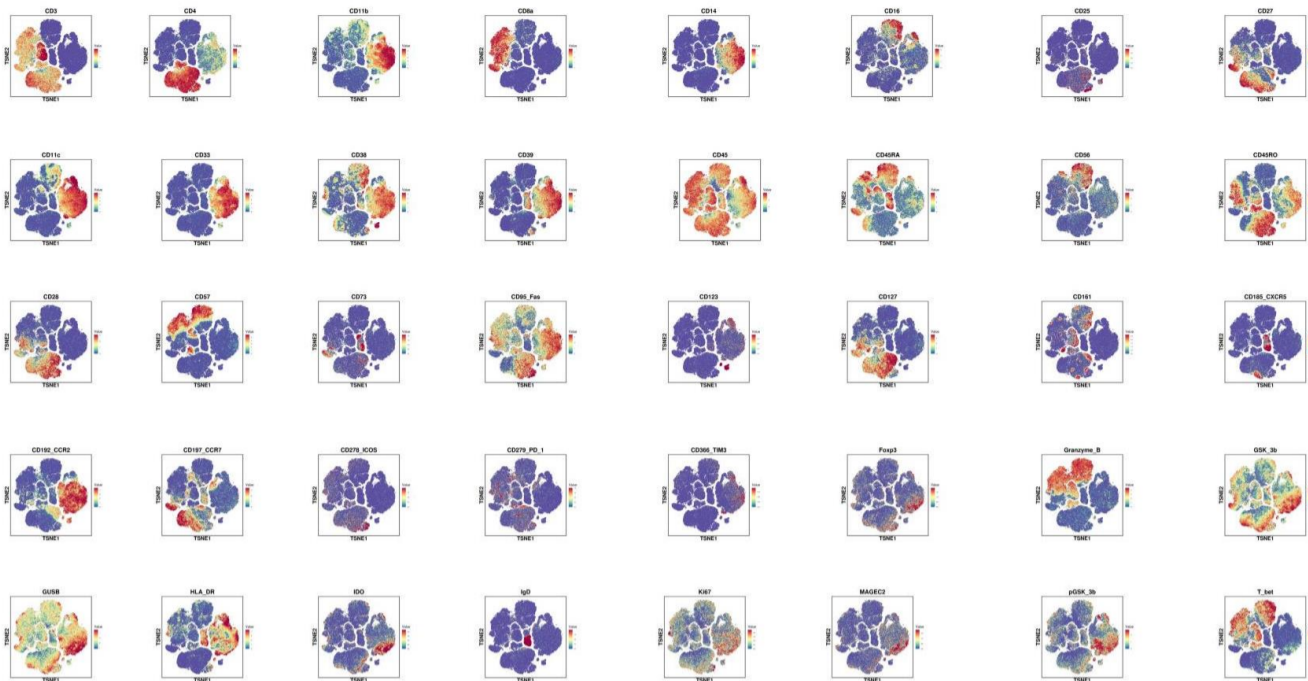

21  
22

23 Figure S7: Escitalopram significantly up-regulated PD-L1 expression by reducing GSK3 $\beta$  in TAMs. Escitalopram-treated TAM could  
24 inhibit the proliferation, invasion and migration of human HCC cells.(A) Schematic showing the process of inducing the M2 phenotype  
25 TAMs. (B) The expression of related proteins in TAMs treated with escitalopram or PBS. (C) The mRNA expression of M2 phenotype  
26 TAM-related surface markers after add escitalopram. (D)Wound healing assays were used to assess cell migration of HCC cells after  
27 cultured with TAM treated with escitalopram. (E) The growth curves of HCC cells were plotted after cultured with TAMs treated with  
28 escitalopram based on CCK-8 assays. (F) EdU assays were performed to assess cell proliferation of HCC-LM3 and YY8103 cell lines  
29 cultured with TAMs treated with escitalopram. (G)Transwell experiment was adopted to assess cell invasion of HCC cells incubated with  
30 TAMs treated with escitalopram. \* $p < 0.05$ , \*\* $p < 0.01$ , \*\*\* $p < 0.001$ , \*\*\*\* $p < 0.0001$ .

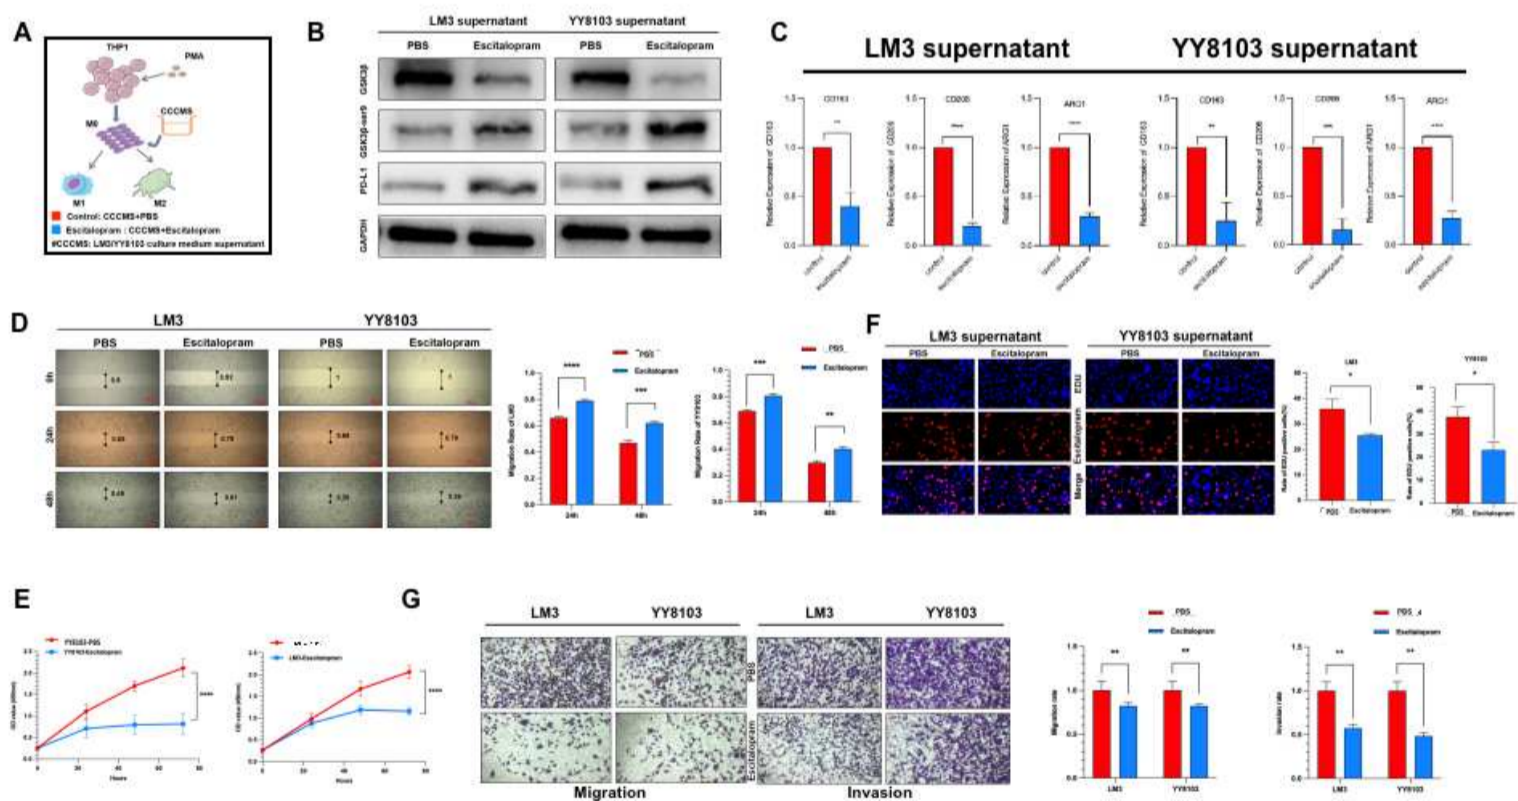

31  
32  
33

Supplementary Table S1. Primer sequences in this study

| Primer      |                | Sequence (5'-3')       |
|-------------|----------------|------------------------|
| human-CD163 | Forward primer | TTTTGTCAACCAGTTCTCTTGG |

|             |                |                           |
|-------------|----------------|---------------------------|
|             | Reverse primer | AGCCATTATTACACGTTCC       |
| human-CD206 | Forward primer | GCTAAATGGGAAAATCTGGAATGTT |
|             | Reverse primer | CGATGGTGTGGATACTTGTGAGG   |
| human-ARG1  | Forward primer | GTGGAAACTTGCATGGACAAC     |
|             | Reverse primer | AATCCTGGCACATCGGGAATC     |
| human-IL6   | Forward primer | AGGATACCACTCCCAACAGACCT   |
|             | Reverse primer | CAAGTGCATCATCGTTGTTTCATAC |
| human-CSF2  | Forward primer | GCTGTCTACGTCGGGATGC       |
|             | Reverse primer | GACCATGCGATCCACCTCTC      |
| human-STAT1 | Forward primer | CAGCTTGACTCAAAATTCCTGGA   |
|             | Reverse primer | TGAAGATTACGCTTGCTTTTCCT   |
| human-CCL5  | Forward primer | CGTGCCACATCAAGGAG         |
|             | Reverse primer | GGACAAGAGCAAGCAGAAAC      |
| human-GAPDH | Forward primer | GCATGGCCTTCCGTGTTT        |
|             | Reverse primer | GATGTCATCATACTTGGCAGGTTT  |
