# Supplementary figures and images for: Macrophage GSK3β-deficiency inhibits the progression of hepatocellular carcinoma and enhances the sensitivity of anti-PD1 immunotherapy
Source: PubMed Central journal article supplement — J Immunother Cancer. 2022 Dec 20;10(12):e005655. doi: 10.1136/jitc-2022-005655 (PMC9772694; doi:10.1136/jitc-2022-005655), 2022-12-20

**A**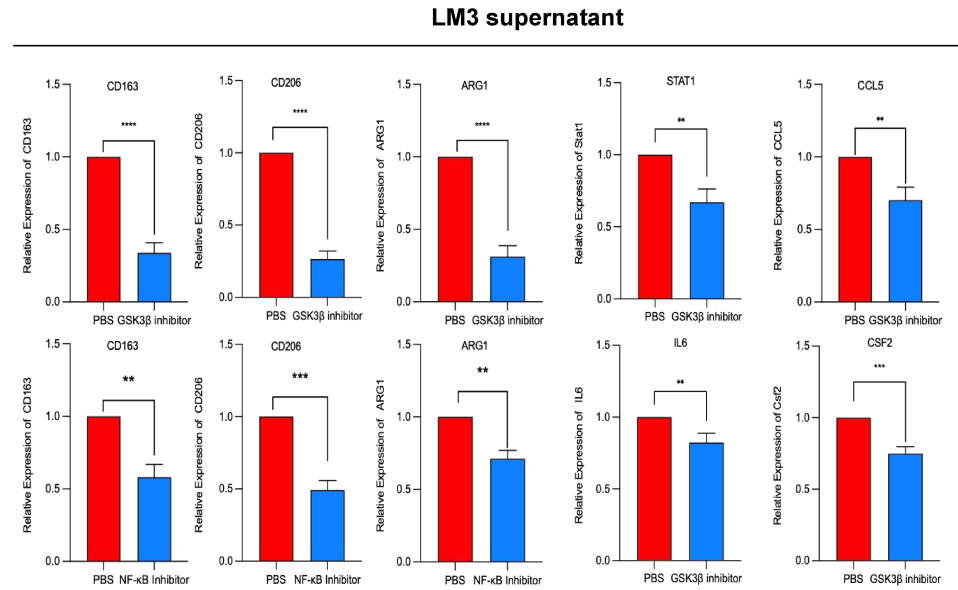**B**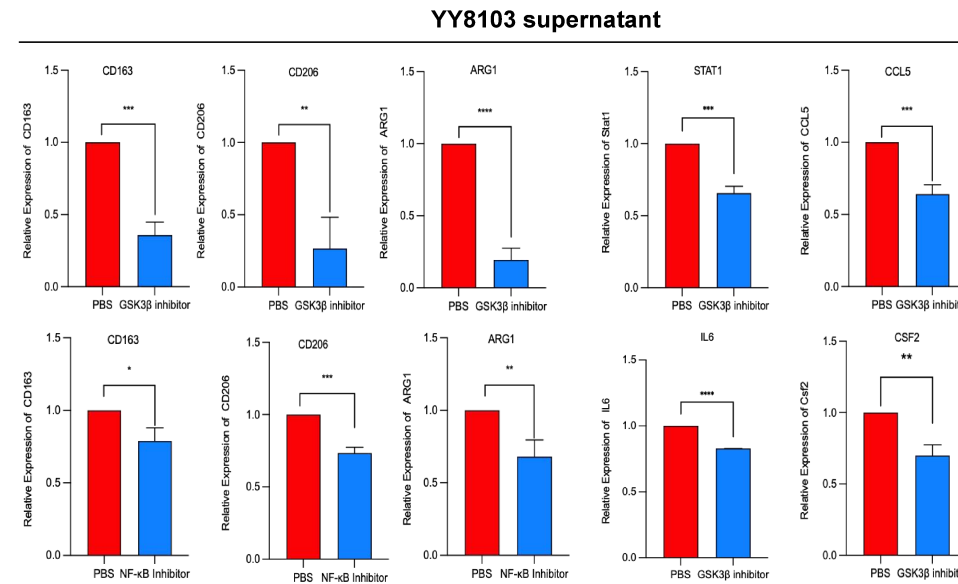**C**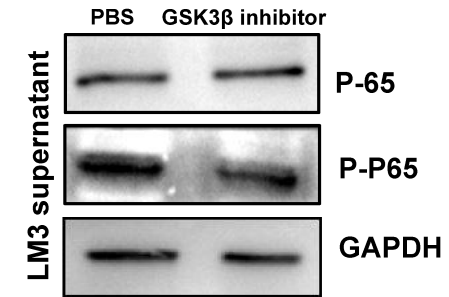**D**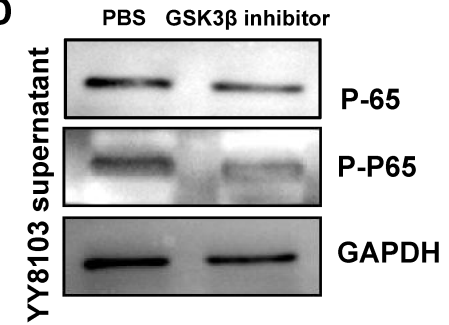**E**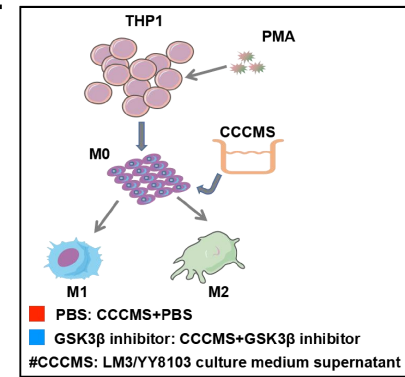

Supplement: jitc-2022-005655supp001.pdf [file jitc-2022-005655supp001.pdf]

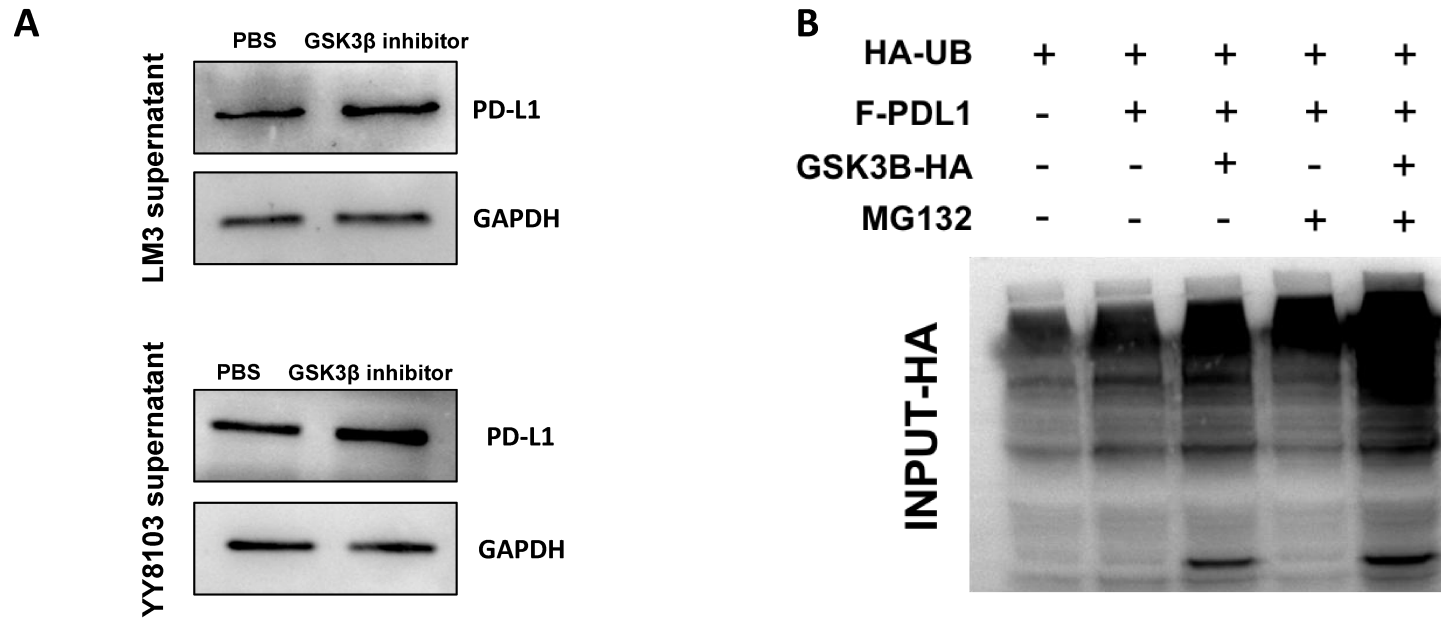

Supplement: jitc-2022-005655supp002.pdf [file jitc-2022-005655supp002.pdf]

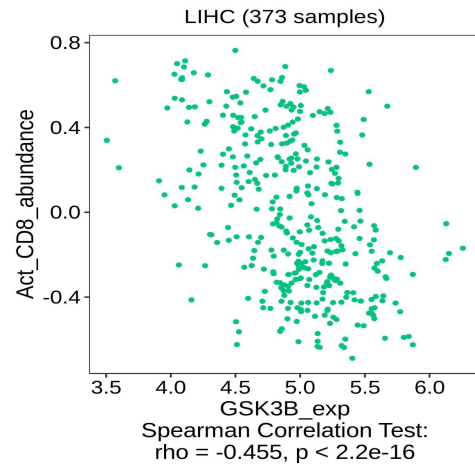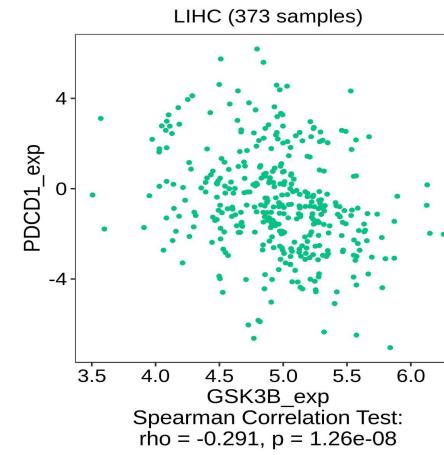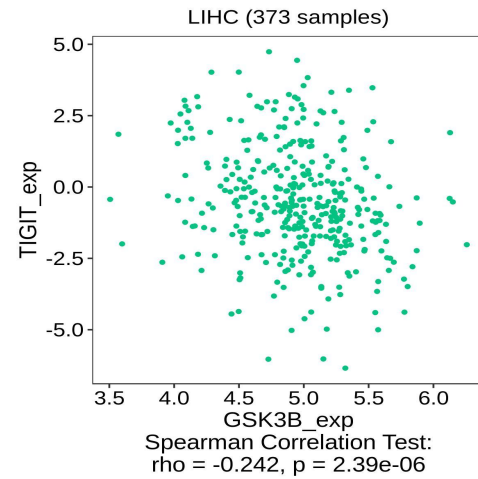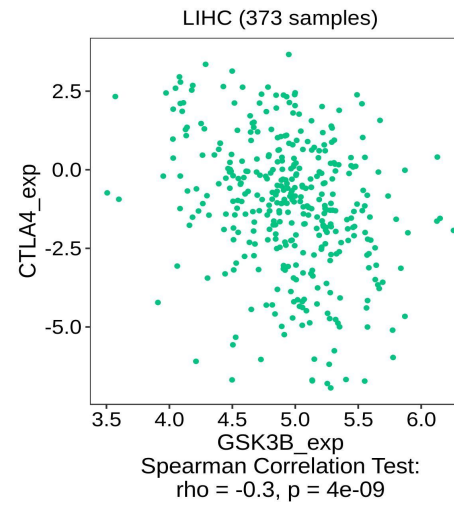

Supplement: jitc-2022-005655supp003.pdf [file jitc-2022-005655supp003.pdf]

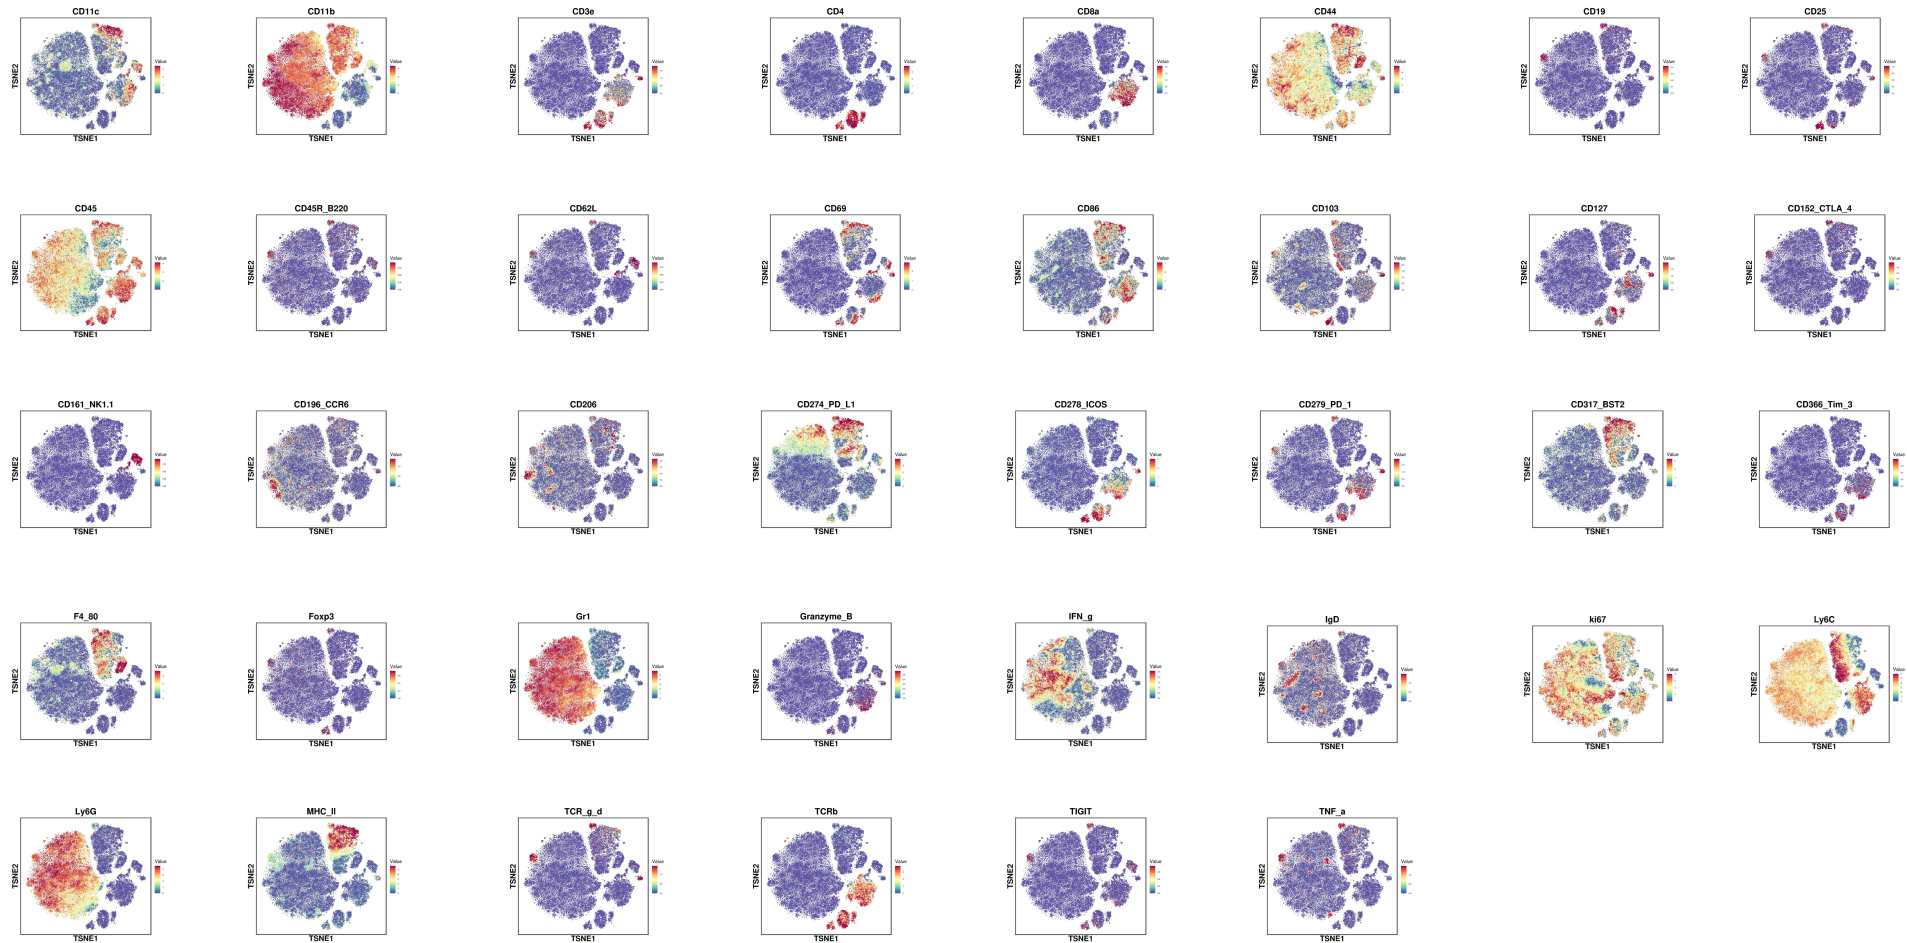

Supplement: jitc-2022-005655supp004.pdf [file jitc-2022-005655supp004.pdf]

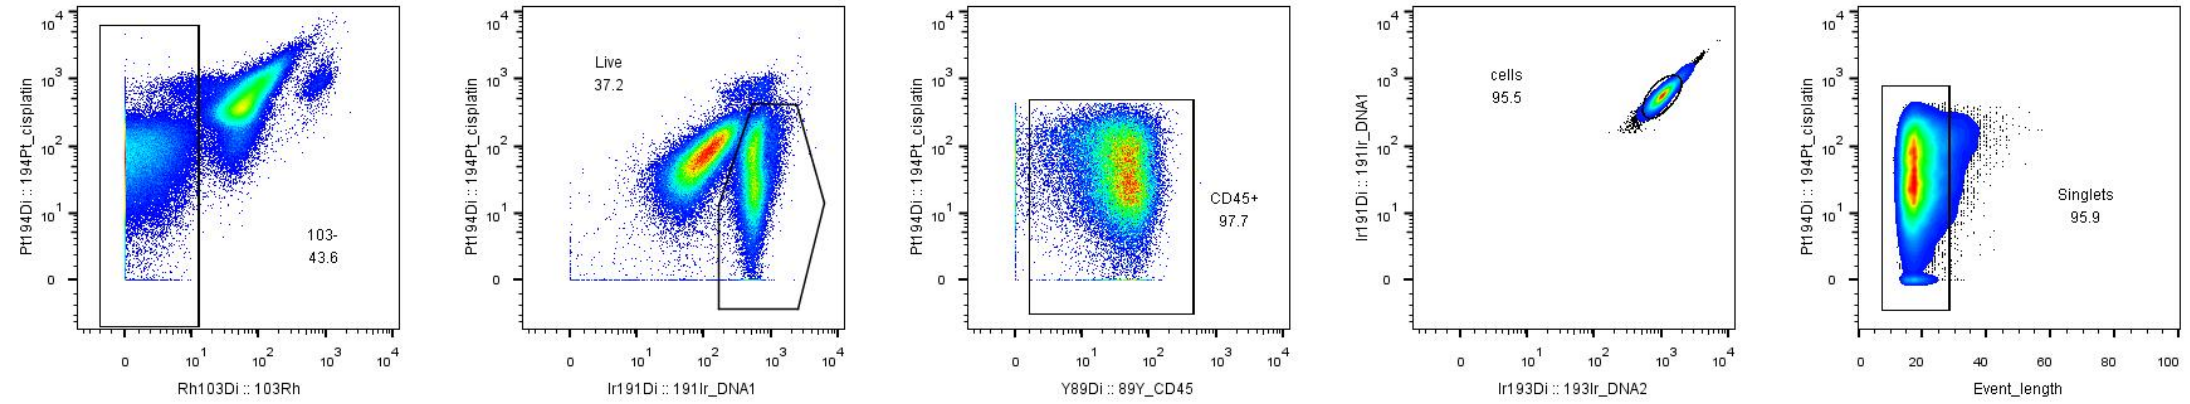

Supplement: jitc-2022-005655supp005.pdf [file jitc-2022-005655supp005.pdf]

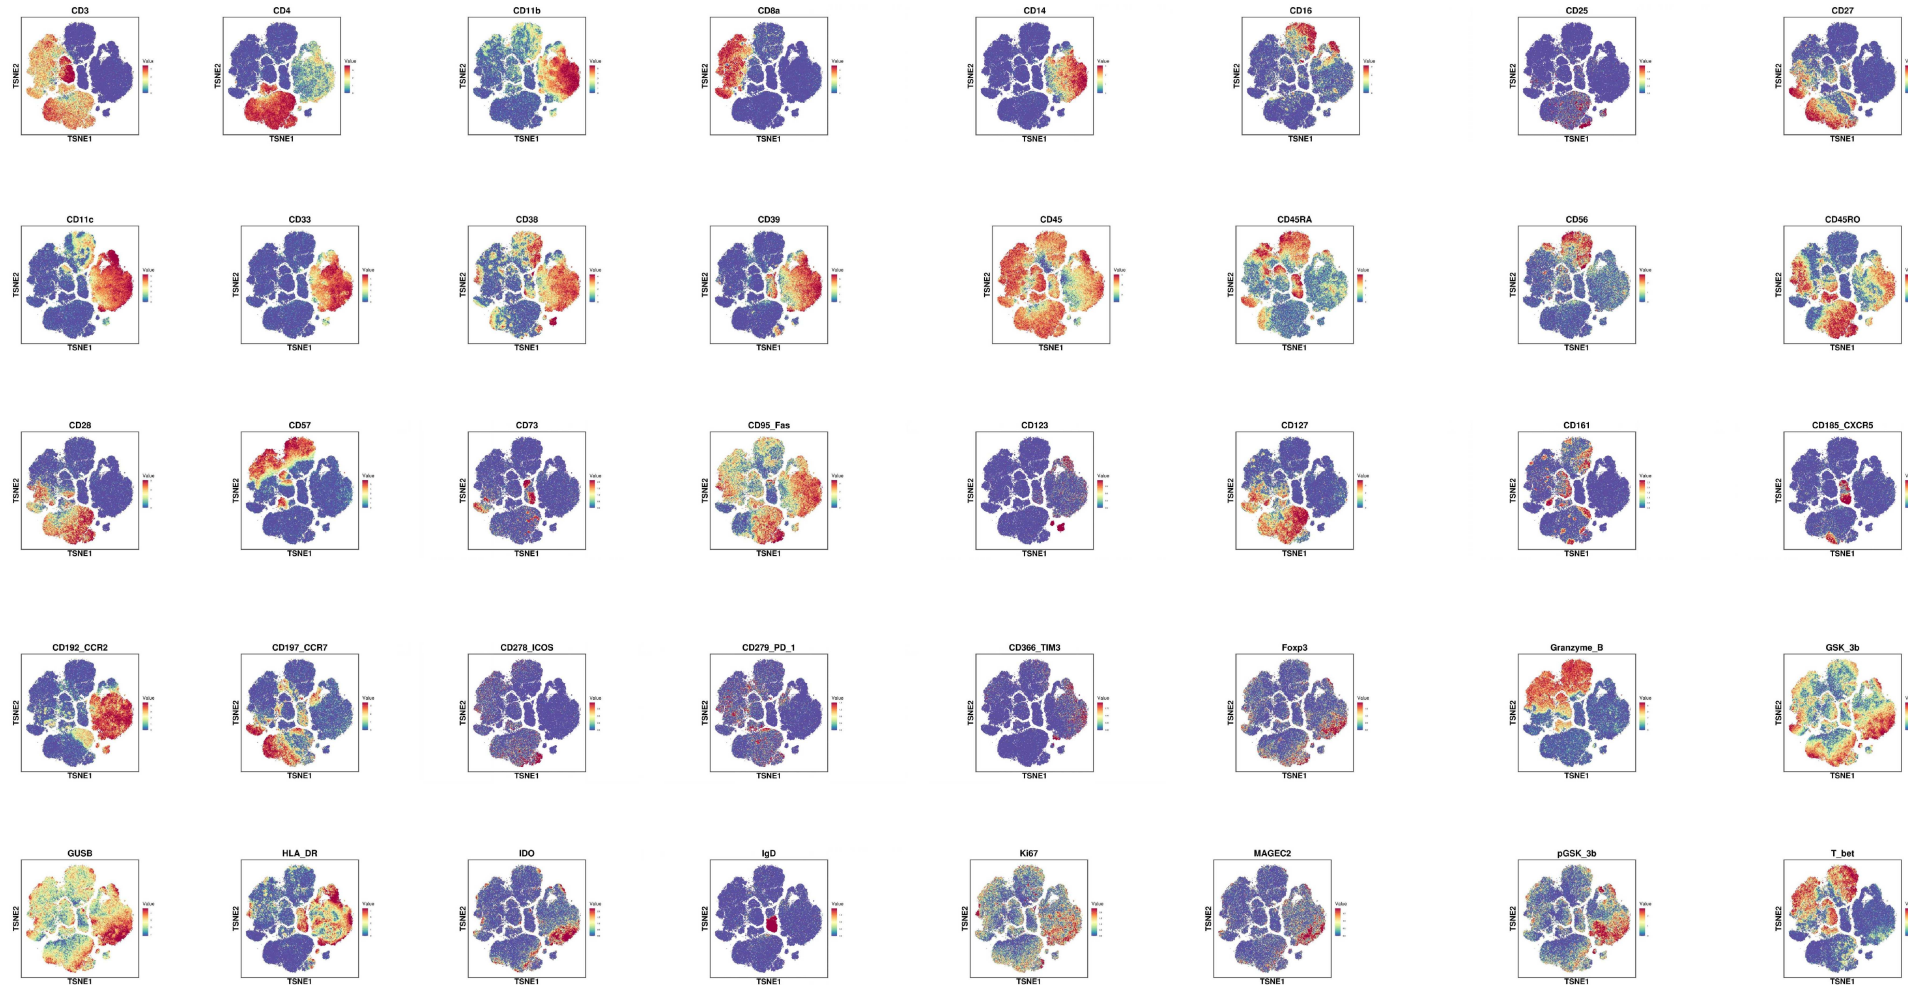

Supplement: jitc-2022-005655supp006.pdf [file jitc-2022-005655supp006.pdf]

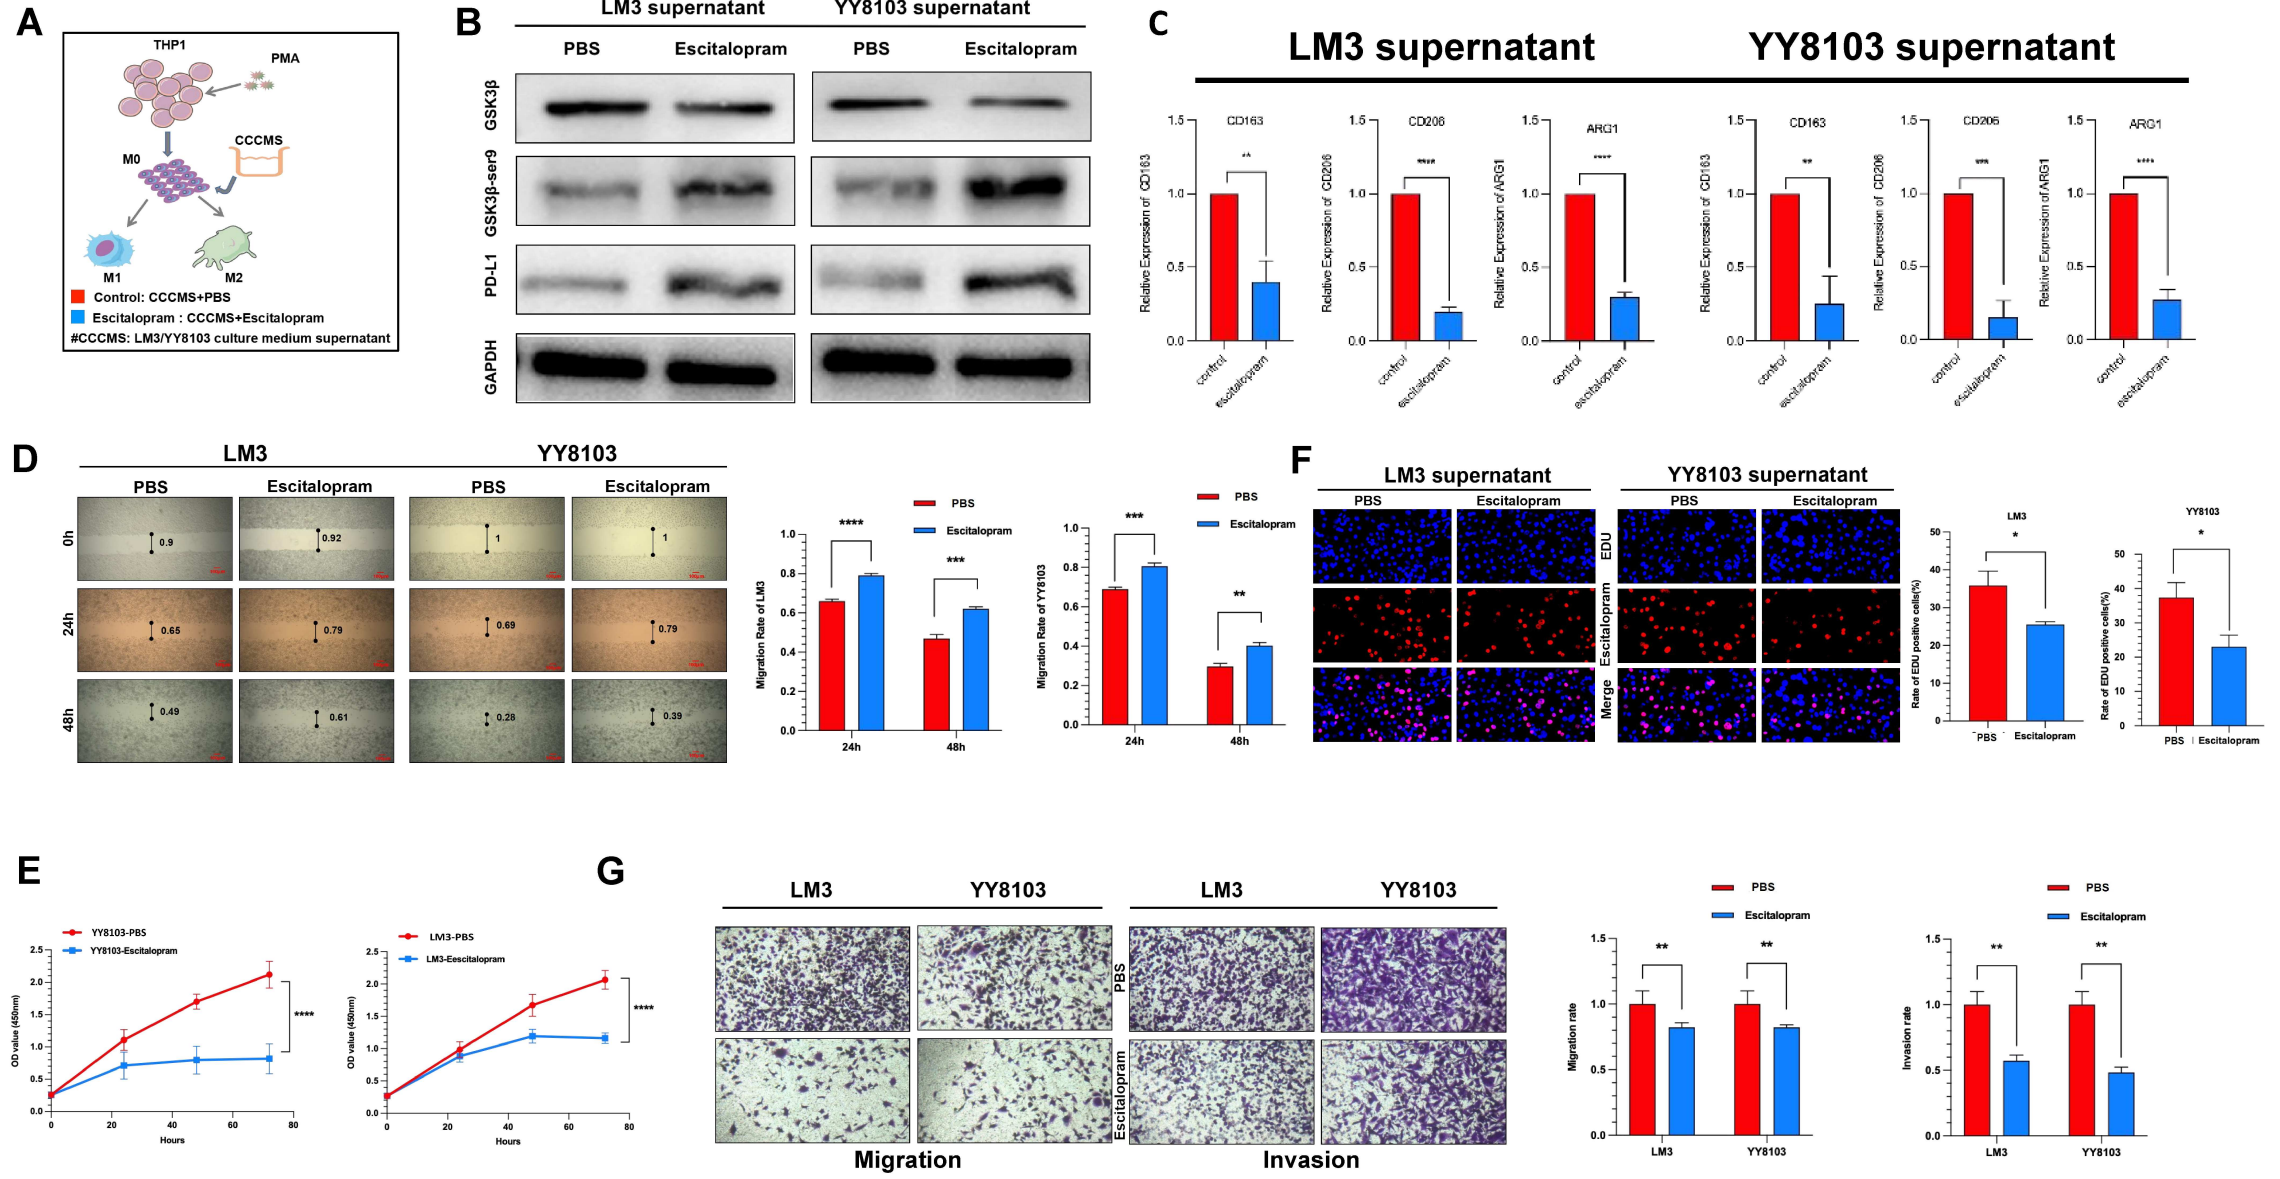

Supplement: jitc-2022-005655supp007.pdf [file jitc-2022-005655supp007.pdf]
